# Supplementary material for: Observations of sunlit N 2 + aurora at high altitudes during the RENU2 flight
Source: Copernicus journal article supplement (doi:10.5194/angeo-39-849-2021), 2021-09-24
Supplement: Supplementary file 1 [file angeo-39-849-2021-supplement.zip]

Archive with 2 entries (2 files):
- angeo-39-849-2021-supplement-title-page.pdf
- Sony_launch.mp4
