# Supplementary material for: Observations of sunlit N 2 + aurora at high altitudes during the RENU2 flight
Source: Copernicus journal article supplement (doi:10.5194/angeo-39-849-2021), 2021-09-24
Supplement: Supplementary file 1 [file angeo-39-849-2021-supplement.zip › angeo-39-849-2021-supplement-title-page.pdf]

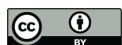

*Supplement of*

## **Observations of sunlit $\text{N}_2^+$ aurora at high altitudes during the RENU2 flight**

**Pål Gunnar Ellingsen et al.**

*Correspondence to:* Pål Gunnar Ellingsen ([pal.g.ellingsen@uit.no](mailto:pal.g.ellingsen@uit.no))

- [angeo-39-849-2021-supplement-title-page.pdf](#)
- [Sony\\_launch.mp4](#)

The copyright of individual parts of the supplement might differ from the article licence.
